# Supplementary material
Source: ML conference proceedings conference paper supplement (https://openreview.net/forum?id=Rym8_qTIB7o)
Supplement: supplementary_material [file attachment]

## A Supplemental Material

### A.1 Notations

We first summarize the symbols in the main body, which will remain in use in the supplementary materials:

Table 1: Major symbols and definitions.

| Symbols                                    | Definitions                                                                                            |
|--------------------------------------------|--------------------------------------------------------------------------------------------------------|
| $\mathcal{G} = (\mathcal{V}, \mathcal{E})$ | graph $\mathcal{G}$ with nodeset $\mathcal{V}$ , edgeset $\mathcal{E}$                                 |
| $\mathbf{A}$                               | $n \times n$ adjacency matrix of $\mathcal{G}$                                                         |
| $\mathbf{L}$                               | normalized graph Laplacian matrix                                                                      |
| $\tilde{\mathbf{L}}$                       | $\tilde{\mathbf{L}} = 2\mathbf{L}/\lambda_{max} - \mathbf{I}$                                          |
| $\mathbf{x}$                               | $n$ -dimensional signal defined on the given graph $\mathcal{G}$                                       |
| $\mathbf{z}$                               | $n$ -dimensional filtered signal                                                                       |
| $\mathcal{Y}$                              | set of class labels                                                                                    |
| $y_v$                                      | class label for node $v \in \mathcal{V}$                                                               |
| $d_{\mathcal{G}}(v, m)$                    | the shortest path distance between two nodes $v$ and $m$ on graph $\mathcal{G}$                        |
| $N(v)$                                     | neighbors of node $v$ in $\mathcal{G}$                                                                 |
| $N_i(v)$                                   | $i$ -hop neighbors of node $v$ , $N_i(v) = \{m : m \in \mathcal{V} \wedge d_{\mathcal{G}}(v, m) = i\}$ |
| $\Theta$                                   | the parameters of the MLP used for feature transformation                                              |
| $\mathbf{W}$                               | the weight matrix of the feature propagation                                                           |
| $\Lambda$                                  | the trainable coefficient of the feature propagation                                                   |
| $\sigma$                                   | the non-linear activation function of the feature propagation                                          |

### A.2 Detailed Analysis of Proposition 3.1

**Proof.** For node  $v$ , following the assumption that its neighbors' class labels  $\{y_m : m \in N(v)\}$  are conditionally independent when  $y_v$  is given, and  $P(y_m = y_v | y_v) = \alpha$ ,  $P(y_m = y | y_v) = \frac{1-\alpha}{|\mathcal{Y}|-1}, \forall y \neq y_v$ , we have  $P(y_m = i | y_v = i) = \alpha$  and  $P(y_m = j | y_v = i) = \frac{1-\alpha}{|\mathcal{Y}|-1}, \forall i, j \in \mathcal{Y}$  and  $j \neq i$ , where  $m \in N(v)$ . The 2-hop neighborhood  $N_2(v)$  of a node  $v$  will be expectedly heterophily-preferred when the following inequality holds:

$$P(y_o = i | y_v = i) - P(y_o \neq i | y_v = i) \leq 0, \forall o \in N_2(v) \quad (1)$$

Consider node  $o \in N_2(v)$ , we have:

$$P(y_o = k | y_v = i) = \sum_{j \in \mathcal{Y}} P(y_o = k | y_m = j) P(y_m = j | y_v = i) \quad (2)$$

Let  $\tau = \frac{(1-\alpha)^2}{|\mathcal{Y}|-1}$  and  $(1-\alpha)^2 = (|\mathcal{Y}|-1)\tau$ . From Eq. 2, we have:

$$P(y_o = i | y_v = i) = \alpha^2 + \tau \quad (3)$$

and for  $j \in \mathcal{Y}$ ,

$$\sum_{j \neq i} P(y_o = j | y_v = i) = P(y_o \neq i | y_v = i) = 2\alpha(1-\alpha) + (|\mathcal{Y}|-2)\tau \quad (4)$$

Hence, defining the difference between  $P(y_o = i | y_v = i)$  and  $P(y_o \neq i | y_v = i)$  as  $\epsilon$ , we have:

$$\epsilon = P(y_o = i | y_v = i) - P(y_o \neq i | y_v = i) = \alpha^2 + \tau - 2\alpha(1-\alpha) - (|\mathcal{Y}|-2)\tau \quad (5)$$

Eq. 5 can be simplified as :

$$\epsilon = (2\alpha^2 - 1) + 2\tau \quad (6)$$

Applying  $\frac{(1-\alpha)^2}{|\mathcal{Y}|-1} = \tau$ , we have

$$\epsilon = \frac{2\alpha(\alpha|\mathcal{Y}|-2) + (3-|\mathcal{Y}|)}{|\mathcal{Y}|-1} \quad (7)$$

17 Notice that  $|\mathcal{Y}| \geq 3$  for multi-class node classification task, it can easily obtain

$$\epsilon \leq \frac{2\alpha(|\mathcal{Y}| - 2)}{|\mathcal{Y}| - 1} \leq 0, \text{ if } \alpha \leq \frac{2}{|\mathcal{Y}|} \quad (8)$$

18 Clearly, the sufficient condition for  $P(y_o = i|y_v = i) - P(y_o \neq i|y_v = i) \leq 0$  is  $\alpha \leq \frac{2}{|\mathcal{Y}|}$ . Thus, the  
19 2-hop neighborhood  $N_2(v)$  of a node  $v$  will always be expectedly heterophily-preferred if  $\alpha \leq \frac{2}{|\mathcal{Y}|}$ .

20 This completes the proof.  $\square$

21 According to Eq. 6 and Eq. 7, we also have remarks as follows:

22 **Remark 1.** For a graph  $\mathcal{G}$  with a class label set  $\mathcal{Y}$ , consider the class labels of the neighbors of  
23 node  $v$  in  $\mathcal{G}$ ,  $\{y_m : m \in N(v)\}$ , are conditionally independent given  $y_v$ , and  $P(y_m = y_v|y_v) = h$ ,  
24  $P(y_m = y|y_v) = \frac{1-h}{|\mathcal{Y}|-1}, \forall y \neq y_v$ , we have: **1)** the 2-hop neighborhood  $N_2(v)$  of a node  $v$  will  
25 always be expectedly homophily-preferred if  $h \geq \sqrt{\frac{1}{2}}$ . **2)** the 2-hop neighborhood  $N_2(v)$  of a node  $v$   
26 will always be expectedly homophily-preferred if  $\mathcal{Y}$  is a binary class label set.

### 27 A.3 Analysis of some existing GNNs from a Polynomial Filtering Perspective

28 **ChebNet [3].** ChebNet first used polynomials to approximate filters, thus avoiding feature decompo-  
29 sition in spectral convolution. The Chebyshev polynomials  $T_k(\cdot)$  is used:

$$\mathbf{z} = \sum_{k=0}^K \theta_k T_k(\tilde{\mathbf{L}}) \mathbf{x} \quad (9)$$

30 Theoretically, the Chebyshev polynomials could approximate arbitrary filters if the order  $K$  is high  
31 enough. Experiments on node classification also empirically demonstrate that ChebNet filters more  
32 effectively than GCN on non-homophilic graphs.

33 **GCN [6].** Kipf et al. simplifies ChebNet to 1-order polynomial approximation, and set  $\theta = \theta_0 =$   
34  $-\theta_1$  [6]. Thus, the filtering operation can be seen as:

$$\mathbf{z} = \sum_{k=0}^1 \theta_k T_k(\tilde{\mathbf{L}}) \mathbf{x} = \theta_0 (\mathbf{I} + \mathbf{D}^{-1/2} \mathbf{A} \mathbf{D}^{-1/2}) \mathbf{x} \approx \theta \tilde{\mathbf{A}} \mathbf{x} \quad (10)$$

35 where  $\tilde{\mathbf{A}}$  is the symmetric normalized adjacency matrix with self-loops. Although GCN uses the  
36 renormalization trick and non-linear activation function, its filtering capability is still limited since  
37 the 1-order polynomial can only approximate a finite number of filters. Moreover, the predefined  
38 coefficients  $(\theta_0, \theta_1)$  render it equivalent to a low-pass filter. More important, analysis of GCN from  
39 the spectral filtering perspective can account for the over-smoothing of the GCN. We can derive from  
40 Eq. 10 that the frequency response of GCN layer is  $\hat{g}(\lambda) = (1 - \lambda)$ , where  $\lambda$  are the eigenvalue of  
41  $\tilde{\mathbf{A}}$ . Hence, the frequency response of GCN is equivalent to  $\hat{g}(\lambda) = (1 - \lambda)^K$  when stacking  $K$  such  
42 layers. As  $K$  tends to infinity, it will approximate an impulse low-pass filter, which means the filtered  
43 signal at each node is the same, i.e., over-smoothing. As a simplified version of the GCN, SGC [8] is  
44 consistent with it.

45 **APPNP [7].** An improved propagation scheme is derived from PageRank in [7], which is also  
46 equivalent to a polynomial filtering operation:

$$\mathbf{z} = (1 - \alpha)^K \tilde{\mathbf{A}}^K \mathbf{x} + \sum_{k=0}^{K-1} \alpha (1 - \alpha)^k \tilde{\mathbf{A}}^k \mathbf{x} \quad (11)$$

47 where  $\alpha \in (0, 1]$  is a hyper-parameter to control the teleport (restart) probability. The second term  
48 is  $K$ -order monomial polynomial of  $\tilde{\mathbf{A}}$  and the coefficient of the  $k$ -order is  $\alpha(1 - \alpha)^k$ . It can be  
49 seen that the fixed  $\alpha$  restricts the expressibility of APPNP, so that only a specific set of filters can be  
50 approximated. Nevertheless, APPNP can approximate more filters than GCN. On the basis of APPNP,  
51 GPRGNN [2] and BernNet [5] improve APPNP via trainable parameters to learn the coefficients of  
52 the polynomial.

53 **ARMA [1].** A recursive and distributed formulation is used to implement the auto-regressive moving  
54 average (ARMA) filter. If we remove the non-linear activation function, the ARMA layer is defined  
55 as follows:

$$\mathbf{z} = \frac{1}{B} \sum_{b=1}^B \bar{\mathbf{x}}_b^{(K)}, \bar{\mathbf{x}}_b^{(K)} = \mathbf{M}^K \mathbf{x} \mathbf{W}_b^K + \sum_{k=0}^{K-1} \mathbf{M}^k \mathbf{x} (\mathbf{V}_b \mathbf{W}_b^k) \quad (12)$$

56 where  $\mathbf{M} = \mathbf{D}^{-1/2} \mathbf{A} \mathbf{D}^{-1/2}$ ,  $\mathbf{W}_{bb=1}^B$  and  $\mathbf{V}_{bb=1}^B$  are the trainable weight matrices. It can be seen that  
57 the second term is a  $K$ -order polynomial of  $\mathbf{M}$  and the coefficient of the  $k$ -order is integrated into the  
58 feature transformation matrix  $\mathbf{V}_b \mathbf{W}_b^k$ . Thus, ARMA is similar to ChebNet which can approximate  
59 arbitrary filters.

#### 60 A.4 Details of Experimental Setup

61 **The Statistics of Datasets.** The statistics of the 10 datasets used in this work are summarized in  
Table 2.

Table 2: Statistics of the used datasets

|                 | Cora  | Cite. | PubMed | Comp.  | Photo  | Cham. | Squi.  | Actor | Texas | Corn. |
|-----------------|-------|-------|--------|--------|--------|-------|--------|-------|-------|-------|
| Nodes           | 2708  | 3327  | 19717  | 13752  | 7650   | 2277  | 5201   | 7600  | 183   | 183   |
| Edges           | 5278  | 4552  | 44324  | 245861 | 119081 | 31371 | 198353 | 26659 | 279   | 277   |
| Features        | 1433  | 3703  | 500    | 767    | 745    | 2325  | 2089   | 932   | 1703  | 1703  |
| Classes         | 7     | 6     | 5      | 10     | 8      | 5     | 5      | 5     | 5     | 5     |
| $\mathcal{H}_G$ | 0.825 | 0.718 | 0.792  | 0.802  | 0.849  | 0.247 | 0.217  | 0.215 | 0.057 | 0.301 |

62

63 **Hardware.** The experiments and models are performed on a workstation with an NVIDIA 2080Ti  
64 GPU (12GB GPU memory), an Intel Xeon E5-2680 CPU (8 cores), and 100GB memory.

65 **Baseline Implementation.** For GPRGNN, BernNet, GeomGCN, and BMGCN, we directly use the  
66 open-source codes released by the original paper. For the others, we use the models that are provided  
67 by [2], which are implemented based on Pytorch Geometric library [4]. Specifically, we use 2 GCN  
68 layers with 64 hidden units for GCN implementation. We use 2 GAT layers for GAT implementation,  
69 where the attention heads are (8, 1), and the number of hidden units of each head is (8, 64). For  
70 ChebyNet, each layer is set to 2 propagation steps with 32 hidden units. For APPNP, we use a 2-layer  
71 MLP with 64 hidden units for feature transformation and 10 steps for feature propagation. For SGC,  
72 we use the default  $K = 2$ . The MLP in baselines is as same as the 2-layer MLP of APPNP. The URL  
73 of the officially released codes are listed as follows:

- 74 • **GPRGNN:** <https://github.com/jianhao2016/GPRGNN>
- 75 • **BernNet:** <https://github.com/ivam-he/BernNet>
- 76 • **GeomGCN:** <https://github.com/graphdml-uiuc-jlu/geom-gcn>
- 77 • **BMGCN:** <https://github.com/hedongxiao-tju/BM-GCN>

78 **NFGNN Implementation and Hyperparameters Tuning.** For our NFGNN, a 2-layer MLP is used  
79 for feature transformation, whose dropout rate  $dp_l$  is set to 0.5 for all datasets, and hidden units is set  
80 to  $(f_h, |\mathcal{Y}|)$ . Besides, we use  $lr_l$  to denote the learning rate of the MLP.  $lr_p$ ,  $dp_p$  are used to denote the  
81 learning rate, dropout rate of the node-oriented filtering layer. The Adam optimizer with weight decay  
82  $L_2$  is used to optimize the model. For the parameter initialization of NFGNN, we use PPR [2] to  
83 initialize  $\Lambda$  and Xavier initialization for  $\Theta$  and  $\mathbf{W}$ . The hyperparameter of PPR is denoted as  $\beta$ . For  
84 each dataset, we search the optimal  $lr_l$  within  $\{0.01, 0.05\}$ ,  $lr_p$  within  $\{0.001, 0.005, 0.01\}$ ,  $dp_p$  and  $\beta$   
85 within  $\{0, 0.1, 0.2, 0.5, 0.7, 0.8, 0.9\}$ ,  $f_h$  within  $\{16, 32, 64\}$ , and  $L_2$  within  $\{0.0001, 0.0005, 0.001\}$ .  
86 The hyperparameters of NFGNN for each dataset are summarized in Table.3.

#### 87 A.5 Additional Experimental results of Node-level Analysis

88 Fig. 1 shows the results of node-level analysis on six datasets. It can be observed that our NFGNN  
89 achieves great performance on each interval with high accuracy. Besides, GCN performs poorly for  
90 nodes with a low homophilic ratio, which is consistent with the analysis of the GCN.

Table 3: Hyperparameters for NFGNN on real-world datasets.

| Datasets  | $lr_l$ | $dp_l$ | $lr_p$ | $dp_p$ | $\beta$ | $f_h$ | $L_2$  | $K$ |
|-----------|--------|--------|--------|--------|---------|-------|--------|-----|
| Cora      | 0.01   | 0.5    | 0.001  | 0.9    | 0.9     | 32    | 0.001  | 10  |
| Citeseer  | 0.05   | 0.5    | 0.001  | 0      | 0.9     | 64    | 0.001  | 10  |
| Pubmed    | 0.05   | 0.5    | 0.001  | 0      | 0.2     | 32    | 0.001  | 10  |
| Computers | 0.05   | 0.5    | 0.005  | 0.7    | 0.5     | 64    | 0      | 10  |
| Photo     | 0.05   | 0.5    | 0.01   | 0.8    | 0.8     | 64    | 0      | 10  |
| Chameleon | 0.01   | 0.5    | 0.01   | 0.5    | 0       | 64    | 0.0001 | 10  |
| Squirrel  | 0.01   | 0.5    | 0.001  | 0.5    | 0       | 64    | 0      | 10  |
| Actor     | 0.05   | 0.5    | 0.001  | 0      | 0.8     | 16    | 0.0005 | 10  |
| Texas     | 0.05   | 0.5    | 0.001  | 0.1    | 0.8     | 32    | 0.0001 | 10  |
| Cornell   | 0.05   | 0.5    | 0.001  | 0.5    | 0.9     | 64    | 0.001  | 10  |

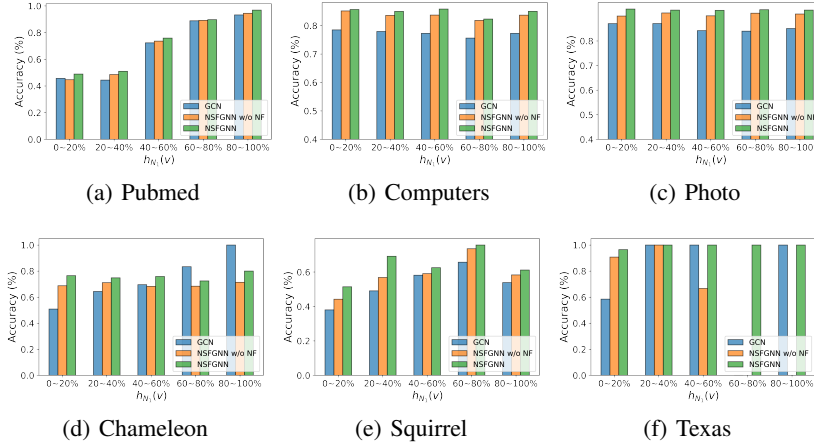

Figure 1: Mean classification accuracy of nodes range by homophily ratio  $h_{N_1}(v)$  on each dataset.

## 91 A.6 Broader Impact

92 NFGNN is a general technical and theoretical contribution, which extends existing methods of  
 93 global consistent spectral filtering and adaptive discrimination of the variations of local homophily  
 94 patterns. We consider the proposed NFGNN might have a positive societal impact since it offers a  
 95 new possibility for network analysis and node prediction to benefit the applications involving graph  
 96 data. We hope that this paper could help researchers understand and develop universal GNNs from a  
 97 spectral domain perspective, thus breaking through the long-held homophily assumptions of GNNs.  
 98 Besides, there are no foreseeable potential negative social impacts of this paper.

## 99 References

- 100 [1] Filippo Maria Bianchi, Daniele Grattarola, Lorenzo Livi, and Cesare Alippi. Graph neural  
 101 networks with convolutional arma filters. *IEEE transactions on pattern analysis and machine*  
 102 *intelligence*, 2021.
- 103 [2] Eli Chien, Jianhao Peng, Pan Li, and Olgica Milenkovic. Adaptive universal generalized pagerank  
 104 graph neural network. *arXiv preprint arXiv:2006.07988*, 2020.
- 105 [3] Michaël Defferrard, Xavier Bresson, and Pierre Vandergheynst. Convolutional neural networks  
 106 on graphs with fast localized spectral filtering. *Advances in neural information processing*  
 107 *systems*, 29, 2016.
- 108 [4] Matthias Fey and Jan Eric Lenssen. Fast graph representation learning with pytorch geometric.  
 109 *arXiv preprint arXiv:1903.02428*, 2019.
- 110 [5] Mingguo He, Zhewei Wei, Hongteng Xu, et al. Bernnet: Learning arbitrary graph spectral filters  
 111 via bernstein approximation. *Advances in Neural Information Processing Systems*, 34, 2021.

- 112 [6] Thomas N Kipf and Max Welling. Semi-supervised classification with graph convolutional  
113 networks. *arXiv preprint arXiv:1609.02907*, 2016.
- 114 [7] Johannes Klicpera, Aleksandar Bojchevski, and Stephan Günnemann. Predict then propagate:  
115 Graph neural networks meet personalized pagerank. *arXiv preprint arXiv:1810.05997*, 2018.
- 116 [8] Felix Wu, Amauri Souza, Tianyi Zhang, Christopher Fifty, Tao Yu, and Kilian Weinberger.  
117 Simplifying graph convolutional networks. In *International conference on machine learning*,  
118 pages 6861–6871. PMLR, 2019.
